# Supplementary material for: Enhancement of the triiodide reduction reaction by doping molybdenum in NiSe hierarchical microspheres: a theoretical and experimental study
Source: Royal Society of Chemistry journal article supplement (doi:10.1039/d2qi02029g), 2022-11-15
Supplement: d2qi02029g1.pdf [file d2qi02029g1.pdf]

## ***Supporting Information***

### **Mo-doped NiSe hierarchical microspheres boosting triiodide evolution for dye-sensitized solar cells: Theoretical and experimental study**

Chunmei Lv<sup>a</sup>, Tao Zhang<sup>a</sup>, Xiuwen Wang<sup>a\*</sup>, Hong Pan<sup>a</sup>, Zhiyu Xie<sup>a</sup>, Hong Lu<sup>a</sup>, Kai Pan<sup>b\*</sup>, and Ying Xie<sup>b\*</sup>

<sup>a</sup> Heilongjiang Province Key Laboratory of Polymeric Composition Material, Qiqihar University, Qiqihar, 161006, China.

<sup>b</sup> Key Laboratory of Functional Inorganic Material Chemistry, Ministry of Education, Heilongjiang University, Harbin, 150080, China.

*\*Corresponding authors.*

xwwang@qqhru.edu.cn (Xiuwen Wang);

kaipan@hlju.edu.cn (Kai Pan);

xiying@hlju.edu.cn (Ying Xie);

## 1. Experimental details

### 1.1 Materials

All the chemicals and reagents were used as received. Nickel acetate tetrahydrate ( $\text{Ni}(\text{CH}_3\text{COO})_2 \cdot 4\text{H}_2\text{O}$ ), sodium selenite ( $\text{Na}_2\text{SeO}_3$ ), diethyltri-amine (DETA), sodium molybdate dihydrate ( $\text{Na}_2\text{MoO}_4 \cdot 2\text{H}_2\text{O}$ ), N-methyl-2-pyrrolidone, acetonitrile, and polyvinylidene fluoride were purchased from the Aladdin Reagent Co., Ltd. The hydrazine hydrate ( $\text{N}_2\text{H}_4 \cdot \text{H}_2\text{O}$ ), acetone and anhydrous ethanol were obtained from Tianjin Fuyu Chemical Reagent Co., Ltd. The conductive substrate is fluorine doped  $\text{SnO}_2$  glass (FTO,  $15 \Omega/\text{square}$ , Nippon sheet glass, Japan). The used Ru complex dye was *cis*-bis(isothiocyanato)bis(2,2'-bipyridyl-4,4'-dicarboxylato) ruthenium (II) bistetrabutyl-ammonium (N719, Solaronix SA, Switzerland). The redox shuttle electrolyte was a blend of 0.1 M LiI (anhydrous, 99 %, Acros), 0.05 M  $\text{I}_2$  (anhydrous, 99.8 %), 0.5 M tert-butylpyridine (99 %, Aldrich), 0.1 M guanidine thiocyanate (99 %, Aladdin Co.) and 0.6 M 1-propyl-2, 3-dimethylimidazolium iodide (99 %) in methoxyacetonitrile (99 %, Fluka).  $\text{H}_2\text{PtCl}_6$  were purchased from the Sinopharm Chemical Reagent Co., Ltd.

### 1.2 Preparation of CEs

The obtained materials such as the  $\text{Mo}_{0.05}\text{-NiSe}$ ,  $\text{Mo}_{0.10}\text{-NiSe}$ , and  $\text{Mo}_{0.15}\text{-NiSe}$ , (95 wt%) and polyvinylidene fluoride (5 wt%, binder) were mixed together with the certain amount of the N-methyl-2-pyrrolidone, followed by stirring and sonication to form the slightly viscous slurry. Then the uniform catalyst films were covered on the surface of a cleansed FTO glass by doctor-blade technique, and sintered in a tube furnace for 1 h at  $400 \text{ }^\circ\text{C}$  under high purity  $\text{N}_2$  atmosphere. For comparison, pyrolytic Pt CE was prepared by drop-casting  $\text{H}_2\text{PtCl}_6$  (50  $\mu\text{L}$ ) in ethanol (5 mM) on the cleansed FTO glass and calcination at  $400 \text{ }^\circ\text{C}$  for 30 min under air atmosphere.

### 1.3 Fabrication of DSSCs

The dye-sensitized  $\text{TiO}_2$  photoanodes were prepared by the standard method. DSSCs assembled into a sandwich structure with the N719 loaded  $\text{TiO}_2$  photoanode, iodine-based electrolyte containing redox couple ( $\text{I}_3^-/\text{I}^-$ ), and CEs ( $\text{Mo}_{0.05}\text{-NiSe}$ ,  $\text{Mo}_{0.10}\text{-NiSe}$ ,

Mo<sub>0.15</sub>-NiSe, and Pt). The redox shuttle electrolyte was injected into the space between the photoanode and CE. In order to prevent the electrolyte solution leakage, two electrodes were adhered together with thermoplastic hot-melted surlyn.

#### 1.4 Characterizations and Measurements

X-ray powder diffraction (XRD) patterns were recorded on an X-ray diffractometer (Rigaku D/max-III B, Cu K $\alpha$ ,  $\lambda=1.5406$  Å) at a scan rate of  $10^\circ \text{ min}^{-1}$  in the range from  $10^\circ$  to  $80^\circ$ . X-ray photoelectron spectroscopy (XPS) was carried out by using a model of VG ESCALAB MK II with an Mg K $\alpha$  (1253.6eV) achromatic X-ray source. Scanning electron microscopy (SEM) was carried out by using a Hitachi S-4800 microscope. Transmission electron microscopy (TEM) and high-resolution TEM (HRTEM) images were obtained from JEM-3010 (JEOL) with a voltage of 200 kV.

The whole electrochemical tests were conducted on a CHI760E electrochemical workstation (Shanghai Chenhua Instrument Corp., Shanghai, China). The typical photocurrent density-voltage (J-V) data of the assembled DSSCs could be detected under AM 1.5 G illumination irradiation ( $100 \text{ mW cm}^{-2}$ ). The active size of DSSCs is  $1.5 \text{ cm}^2$ , and the irradiation area is  $0.20 \text{ cm}^2$  with a photomask. Cyclic voltammetry (CV) was carried out in a three-electrode system. Specifically, the as-prepared materials and Pt CEs were worked as a working electrode, Pt plate was used as a CE, Ag/AgCl was used as a reference electrode. The supporting electrolyte was an anhydrous acetonitrile solution of 0.1 M LiClO<sub>4</sub>, 10 mM LiI, and 1mM I<sub>2</sub>, and the potential range was from -0.4 V to 1.0 V. Electrochemical impedance spectroscopy (EIS, bias voltage: 0 mV; frequency range: 0.01 Hz to 100 kHz; disturbance voltage: 10 mV) and Tafel polarization data were assembled as the style of the symmetrical cells which were full of the identical electrolyte. The obtained EIS data were fitted by the Z-View software in terms of appropriate equivalent circuits.

#### 1.5 Computational method

All calculations based on DFT were carried out using the Vienna ab initio simulation package (VASP)<sup>1,2</sup>. Perdew-Burke-Ernzerhof functional with a generalized gradient approximation (GGA-PBE)<sup>3</sup> form was adopted to deal with the exchange correlation energies of the systems. The plane-wave and pseudo-potential techniques

were used<sup>4</sup>, and the energy cutoff was 400 eV. To obtain a good numerical sampling of electron densities in Brillouin zone, a (3×3×1) Monkhorst-Pack mesh was applied to the NiSe<sub>2</sub> surface and a (5×5×1) one for the density of states calculation. The van der Waals (vdW) interactions were considered as the DFT-D2 method of Grimme for all the calculations<sup>5</sup>. The optimization procedure was repeated until the maximum residual force is less than 0.02 eV·Å<sup>-1</sup> in any directions. During the calculations, a vacuum layer of 15 Å is used to avoid the fake interactions between periodic images along z axis.

## 2. Supporting data

**Table S1** Adsorption data of  $I_3^-$  complex on metal sites of NiSe and Mo-NiSe.

|         | Metal sites | Adsorption energy (eV) |
|---------|-------------|------------------------|
| NiSe    | Ni          | -1.08                  |
| Mo-NiSe | Mo          | -1.84                  |
|         | Ni          | -1.65                  |

**Table S2** EDS analysis of obtained samples with average value in random three spots.

| Samples                  | Atom (%) |       |       |
|--------------------------|----------|-------|-------|
|                          | Mo       | Ni    | Se    |
| Mo <sub>0.05</sub> -NiSe | 0.24     | 44.92 | 54.84 |
| Mo <sub>0.10</sub> -NiSe | 0.44     | 44.58 | 54.98 |
| Mo <sub>0.15</sub> -NiSe | 0.65     | 44.28 | 55.07 |

**Table S3** Performance parameters of devices based on the different CEs.

| CEs                      | $V_{oc}$ (V) | $J_{sc}$ (mA/cm <sup>2</sup> ) | FF        | PCE (%)   | $R_s$ ( $\Omega$ ) | $R_{ct}$ ( $\Omega$ ) |
|--------------------------|--------------|--------------------------------|-----------|-----------|--------------------|-----------------------|
| NiSe                     | 0.761±0.005  | 16.03±0.31                     | 0.62±0.01 | 7.51±0.13 | 32.43              | 17.62                 |
| Mo <sub>0.05</sub> -NiSe | 0.773±0.006  | 16.92±0.35                     | 0.64±0.01 | 8.40±0.11 | 24.07              | 8.11                  |
| Mo <sub>0.10</sub> -NiSe | 0.768±0.004  | 18.07±0.28                     | 0.64±0.01 | 8.92±0.09 | 23.17              | 3.67                  |
| Mo <sub>0.15</sub> -NiSe | 0.768±0.006  | 17.72±0.32                     | 0.63±0.01 | 8.62±0.12 | 24.03              | 5.69                  |
| Pt                       | 0.755±0.005  | 16.18±0.29                     | 0.63±0.01 | 7.74±0.07 | 24.17              | 11.03                 |

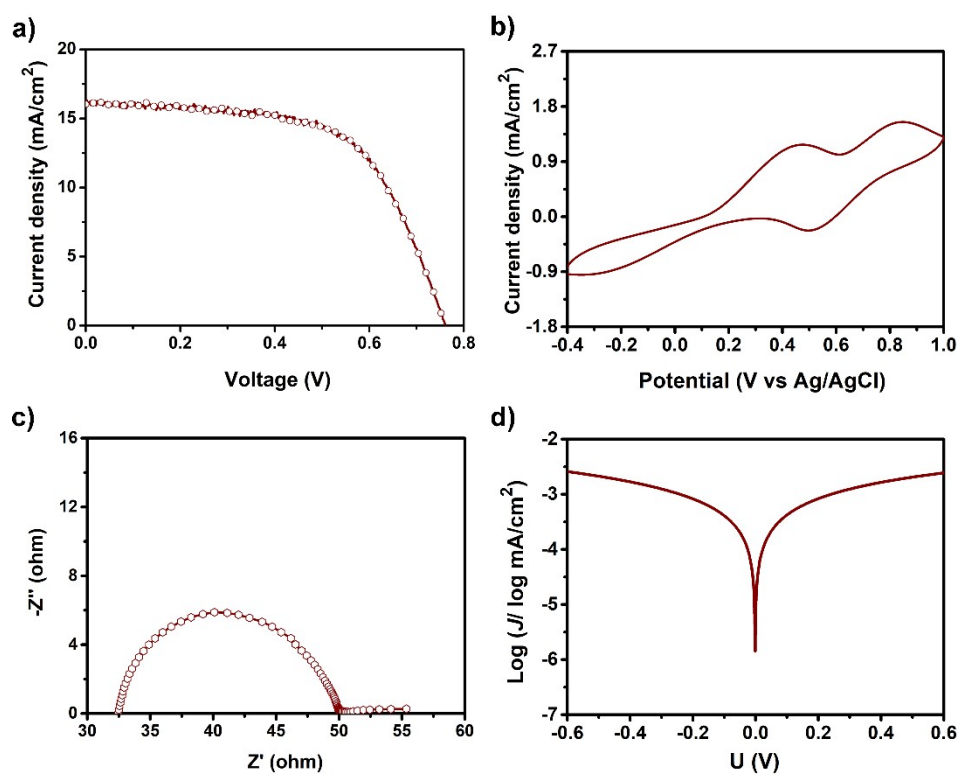

**Fig. S1** J-V curve (a), CV curve (b), EIS (c), and Tafel polarization curves (d) based on the pure NiSe CEs.

**Table S4** Photovoltaic parameters of DSSCs based on Ni-based selenide.

| CEs                           | $J_{sc}$<br>(mA/cm <sup>2</sup> ) | $V_{oc}$<br>(V) | $FF$        | $\eta$<br>(%) | $\eta$ (Pt)<br>(%) | Ref.             |
|-------------------------------|-----------------------------------|-----------------|-------------|---------------|--------------------|------------------|
| NiCoSe                        | 18.5                              | 0.71            | 0.66        | 8.19          | 6.53               | 6                |
| NiSe-sb                       | 15.90                             | 0.62            | 0.69        | 6.75          | 6.18               | 7                |
| NiSe-112                      | 18.16                             | 0.706           | 0.59        | 7.61          | 7.85               | 8                |
| NiSe <sub>2</sub> -180        | 15.49                             | 0.756           | 0.66        | 7.78          | 8.07               | 9                |
| Ni <sub>0.85</sub> Se         | 16.67                             | 0.74            | 0.64        | 7.85          | 6.18               | 10               |
| 6%GLW-NiCoSe                  | 16.72                             | 0.72            | 0.65        | 8.14          | 7.20               | 11               |
| NiSe/GN <sub>0.50</sub>       | 16.73                             | 0.75            | 0.68        | 8.62          | 7.68               | 12               |
| NiCoSe <sub>2</sub> -150      | 17.82                             | 0.77            | 0.63        | 8.76          | 8.22               | 13               |
| NiSe <sub>2</sub> -W          | 18.08                             | 0.74            | 0.66        | 8.78          | 7.97               | 14               |
| <b>Mo<sub>0.10</sub>-NiSe</b> | <b>18.07</b>                      | <b>0.768</b>    | <b>0.64</b> | <b>8.92</b>   | <b>7.74</b>        | <b>This work</b> |

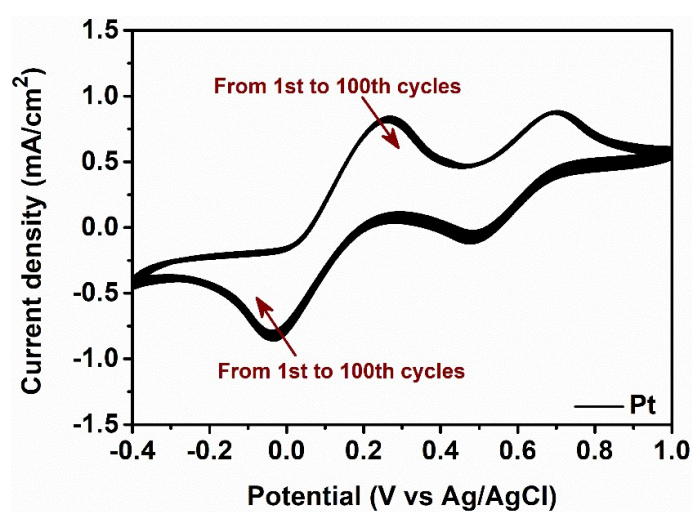**Fig. S2** 100 consecutive CV curves of Pt CEs.

## References

1. J. Hafner, Ab-initio simulations of materials using VASP: Density-functional theory and beyond, *J. Comput. Chem.*, 2008, **29**, 2044-2078.
2. G. Kresse and J. Furthmüller, Efficient iterative schemes for ab initio total-energy calculations using a plane-wave basis set, *Phys. Rev. B*, 1996, **54**, 11169-11186.
3. J. P. Perdew, K. Burke and M. Ernzerhof, Generalized gradient approximation made simple, *Phys. Rev. Lett.*, 1996, **77**, 3865-3868.
4. G. Kresse and D. Joubert, From ultrasoft pseudopotentials to the projector augmented-wave method, *Phys. Rev. B*, 1999, **59**, 1758-1775.
5. S. Grimme, J. Antony, S. Ehrlich and H. Krieg, A consistent and accurate ab initio parametrization of density functional dispersion correction (DFT-D) for the 94 elements H-Pu, *J. Chem. Phys.*, 2010, **132**.
6. W.-W. Liu, W. Jiang, Y.-C. Liu, W.-J. Niu, M.-C. Liu, K. Zhao, L.-Y. Zhang, L. Lee, L.-B. Kong and Y.-L. Chueh, Platinum-free ternary metallic selenides as nanostructured counter electrode for high-efficiency dye-sensitized solar cell by interface engineering, *ACS Appl. Energy Mater.*, 2020, **3**, 3704-3713.
7. C. Bao, F. Li, J. Wang, P. Sun, N. Huang, Y. Sun, L. Fang, L. Wang and X. Sun, One-pot solvothermal in situ growth of 1D single-crystalline NiSe on Ni foil as efficient and stable transparent conductive oxide free counter electrodes for dye-sensitized solar cells, *ACS Appl. Mater. Interfaces*, 2016, **8**, 32788-32796.
8. L. Sun, T. Zhang, Y. Liu, J. Wang, W. Zong, Y. Cao and X. Wang, Hierarchical NiSe microspheres as high-efficiency counter electrode catalysts for triiodide reduction reaction, *Sol. Energy*, 2021, **225**, 486-493.
9. L. Shao, X. Qian, H. Li, C. Xu and L. Hou, Shape-controllable syntheses of ternary Ni-Co-Se alloy hollow microspheres as highly efficient catalytic materials for dye-sensitized solar cells, *Chem. Eng. J.*, 2017, **315**, 562-572.
10. Y. Duan, Q. Tang, J. Liu, B. He and L. Yu, Transparent metal selenide alloy counter electrodes for high-efficiency bifacial dye-sensitized solar cells, *Angew. Chem. Int. Ed.*, 2014, **53**, 14569-14574.



11. Y. Areerob, J. Y. Cho, W. K. Jang, K. Y. Cho and W.-C. Oh, An alternative of NiCoSe doped graphene hybrid  $\text{La}_6\text{W}_2\text{O}_{15}$  for renewable energy conversion used in dye-sensitized solar cells, *Solid State Ionics*, 2018, **327**, 99-109.
12. V. Murugadoss, J. Lin, H. Liu, X. Mai, T. Ding, Z. Guo and S. Angaiah, Optimizing graphene content in a NiSe/graphene nanohybrid counter electrode to enhance the photovoltaic performance of dye-sensitized solar cells, *Nanoscale*, 2019, **11**, 17579-17589.
13. X. Chen, J. Ding, Y. Li, Y. Wu, G. Zhuang, C. Zhang, Z. Zhang, C. Zhu and P. Yang, Size-controllable synthesis of NiCoSe<sub>2</sub> microspheres as a counter electrode for dye-sensitized solar cells, *RSC Adv.*, 2018, **8**, 26047-26055.
14. C. Lv, L. Sun, Q. Li, X. Wang, T. Zhang, Y. Cao, Z. Yang and L. Qi, Oleic acid-mediated synthesis of small-sized and monodisperse NiSe<sub>2</sub> nanowires as counter electrode catalysts for triiodide reduction, *Electrochim. Acta*, 2020, **355**, 136818.
